# Supplementary material
Source: Springer Nature journal article supplement (https://www.springermedizin.de/resource/supplementary/12904_2011_110_MOESM2_ESM.PDF/9517532)
Supplement: MOESM2 [file 9517532]

### Additional file 2 – Intervention form

The pharmacist would insert a free text description of the drug related problem (DRP)

and their recommendation to resolve it, and use the categories below to classify the DRP

and recommendation.

# Pharmacist in Community Palliative Care Multidisciplinary Teams Project

## Intervention tool

[illegible]

## Classification of Drug Related Problems

|                                         |                                                                                                                                                                                                                  |
|-----------------------------------------|------------------------------------------------------------------------------------------------------------------------------------------------------------------------------------------------------------------|
| D Drug selection                        | D1 Duplication<br>D2 Drug interaction<br>D3 Wrong drug<br>D4 Incorrect strength<br>D5 Inappropriate dosage form<br>D6 Contraindications apparent<br>D7 No indication apparent<br>D8 Other drug selection problem |
| O Over or under-dose                    | O1 Prescribed dose too high<br>O2 Prescribed dose too low<br>O3 Incorrect or unclear dosing instructions<br>O0 Other dose problem                                                                                |
| C Compliance                            | C1 Taking too little<br>C2 Taking too much<br>C3 Erratic use of medication<br>C4 Intentional drug misuse (Including OTCs)<br>C5 Difficulty with dosage form<br>C0 Other compliance problem                       |
| U Under-treated or Untreated indication | U1 Condition not adequately treated<br>U2 Condition untreated<br>U3 Preventive therapy required<br>U0 Other untreated indication problem                                                                         |
| M Monitoring required                   | M1 Laboratory monitoring<br>M2 Non-laboratory monitoring<br>M0 Other monitoring problem                                                                                                                          |
| E Education or Information              | E1 Patient requests drug information<br>E2 Patient requests disease management advice<br>E0 Other education or information problem                                                                               |
| N Not classifiable                      | N0 Clinical interventions that cannot be classified under another category                                                                                                                                       |
| T Toxicity or adverse reaction          | T1 Toxicity, allergic reaction or adverse effect present                                                                                                                                                         |

## Classification of Recommendations

|                          |                                                                                                                                                                                             |
|--------------------------|---------------------------------------------------------------------------------------------------------------------------------------------------------------------------------------------|
| A change in therapy      | R1 Dose change<br>R2 Drug change<br>R3 Drug formulation change<br>R4 Drug brand change<br>R5 Dose frequency/schedule change<br>R6 Prescription not dispensed<br>R7 Other changes to therapy |
| A referral required      | R8 Refer to prescriber<br>R9 Refer to hospital<br>R10 Refer for medication review<br>R11 Other referral required                                                                            |
| Provision of information | R12 Education or counselling session<br><br>R13 Written summary of medications<br>R14 Commence dose administration aid<br>R15 Other written information                                     |
| Monitoring               | R16 Monitoring. Non-laboratory<br>R17 Monitoring. Laboratory test                                                                                                                           |
| Other                    | R18 No recommendation necessary                                                                                                                                                             |
